# Supplementary material
Source: PubMed Central journal article supplement (PMC7344104)
Supplement: ajtr0012-2998-f5.pdf [file ajtr0012-2998-f5.pdf]

## Smoking influence on male and female phenotypes

**Table S1.** Two Way Analysis of Variance report for the blood parameters included in PCA before body weight normalisation

|                                           | Sex-gender                           | Smoke effect                     | Sex-gender x smoke                |
|-------------------------------------------|--------------------------------------|----------------------------------|-----------------------------------|
| Age (y)                                   | F value: 1.121<br>P value: 0.291     | F value: 3.538<br>P value: 0.062 | F value: 1.518<br>P value: 0.220  |
| Weight (Kg)                               | F value: 134.460<br>P value: < 0.001 | F value: 0.690<br>P value: 0.407 | F value: 5.813<br>P value: 0.017  |
| BMI (Kg/m <sup>2</sup> )                  | F value: 30,041<br>P value: < 0.001  | F value: 0.687<br>P value: 0.408 | F value: 5.012<br>P value: 0.027  |
| Glycaemia (mg dl <sup>-1</sup> )          | F value: 6.604<br>P value: 0.011     | F value: 3.282<br>P value: 0.072 | F value: 0.081<br>P value: 0.775  |
| TChol (mg dl <sup>-1</sup> )              | F value: 4.413<br>P value: 0.037     | F value: 1.277<br>P value: 0.260 | F value: 3.381<br>P value: 0.068  |
| LDL (mg dl <sup>-1</sup> )                | F value: 2.245<br>P value: 0.136     | F value: 4.699<br>P value: 0.032 | F value: 3.702<br>P value: 0.056  |
| HDL (mg dl <sup>-1</sup> )                | F value: 15.784<br>P value: < 0.001  | F value: 0.427<br>P value: 0.514 | F value: 0.103<br>P value: 0.749  |
| HDL/LDL                                   | F value: 0.000208<br>P value: 0.996  | F value: 4.173<br>P value: 0.043 | F value: 4.019<br>P value: 0.047  |
| TG (mg dl <sup>-1</sup> )                 | F value: 4.476<br>P value: 0.036     | F value: 3.114<br>P value: 0.079 | F value: 2.018<br>P value: 0.157  |
| Cr (mg ml <sup>-1</sup> )                 | F value: 164.186<br>P value: < 0.001 | F value: 0.500<br>P value: 0.480 | F value: 1.426<br>P value: 0.234  |
| CrCl (mg min <sup>-1</sup> )              | F value: 21.52<br>P value: < 0.001   | F value: 0.099<br>P value: 0.753 | F value: 2.000<br>P value: 0.159  |
| Urea (mg dl <sup>-1</sup> )               | F value: 19.493<br>P value: < 0.001  | F value: 1.956<br>P value: 0.164 | F value: 0.453<br>P value: 0.502  |
| Uric Acid (mg dl <sup>-1</sup> )          | F value: 78.952<br>P value: < 0.001  | F value: 0.757<br>P value: 0.385 | F value: 4.227<br>P value: 0.041  |
| AST (U l <sup>-1</sup> )                  | F value: 16.842<br>P value: < 0.001  | F value: 1.117<br>P value: 0.292 | F value: 1.982<br>P value: 0.161  |
| ALT (U l <sup>-1</sup> )                  | F value: 24.143<br>P value: < 0.001  | F value: 2.400<br>P value: 0.123 | F value: 7.385<br>P value: 0.007  |
| γ-GT (U l <sup>-1</sup> )                 | F value: 18.562<br>P value: < 0.001  | F value: 0.818<br>P value: 0.367 | F value: 1.704<br>P value: 0.194  |
| Bilirubin (mg dl <sup>-1</sup> )          | F value: 3.578<br>P value: 0.060     | F value: 1.541<br>P value: 0.216 | F value: 0.0266<br>P value: 0.871 |
| Alkaline Phosphatase (U l <sup>-1</sup> ) | F value: 6.214<br>P value: 0.014     | F value: 0.267<br>P value: 0.606 | F value: 4.579<br>P value: 0.034  |
| Na <sup>+</sup> (mEq l <sup>-1</sup> )    | F value: 24,393<br>P value: < 0.001  | F value: 1.188<br>P value: 0.277 | F value: 0.0111<br>P value: 0.916 |
| K <sup>+</sup> (mEq l <sup>-1</sup> )     | F value: 3.335<br>P value: 0.070     | F value: 0.717<br>P value: 0.398 | F value: 0.163<br>P value: 0.687  |
| Ca <sup>2+</sup> (mg dl <sup>-1</sup> )   | F value: 0.794<br>P value: 0.374     | F value: 0.239<br>P value: 0.626 | F value: 3.173<br>P value: 0.077  |
| Sideremia (µg l <sup>-1</sup> )           | F value: 2.260<br>P value: 0.135     | F value: 0.291<br>P value: 0.590 | F value: 1.909<br>P value: 0.169  |
| TSH (µUI ml <sup>-1</sup> )               | F value: 0.512<br>P value: 0.475     | F value: 0.130<br>P value: 0.719 | F value: 0.305<br>P value: 0.581  |

## Smoking influence on male and female phenotypes

|                                   |                                     |                                     |                                     |
|-----------------------------------|-------------------------------------|-------------------------------------|-------------------------------------|
| RBC ( $10^{12} l^{-1}$ )          | F value: 68.836<br>P value: < 0.001 | F value: 2.082<br>P value: 0.151    | F value: 0.000298<br>P value: 0.986 |
| Hb (g dl <sup>-1</sup> )          | F value: 68.385<br>P value: < 0.001 | F value: 0.0168<br>P value: 0.897   | F value: 4.579<br>P value: 0.031    |
| Haematocrit (%)                   | F value: 75.543<br>P value: < 0.001 | F value: 0.150<br>P value: 0.699    | F value: 2.433<br>P value: 0.121    |
| MCV (fl)                          | F value: 3.504<br>P value: 0.063    | F value: 2.045<br>P value: 0.155    | F value: 0.324<br>P value: 0.570    |
| WBC ( $10^9 l^{-1}$ )             | F value: 3.503<br>P value: 0.063    | F value: 14.802<br>P value: < 0.001 | F value: 0.169<br>P value: 0.681    |
| Neutrophils ( $10^3 \mu l^{-1}$ ) | F value: 1.820<br>P value: 0.179    | F value: 8.358<br>P value: 0.004    | F value: 0.0168<br>P value: 0.897   |
| Lymphocytes ( $10^3 \mu l^{-1}$ ) | F value: 0.541<br>P value: 0.463    | F value: 7.282<br>P value: 0.008    | F value: 0.771<br>P value: 0.381    |
| Monocytes ( $10^3 \mu l^{-1}$ )   | F value: 17.437<br>P value: < 0.001 | F value: 7.204<br>P value: 0.008    | F value: 0.468<br>P value: 0.495    |
| Eosinophils ( $10^3 \mu l^{-1}$ ) | F value: 5.525<br>P value: 0.020    | F value: 8.356<br>P value: 0.004    | F value: 2.527<br>P value: 0.114    |
| Basophils ( $10^3 \mu l^{-1}$ )   | F value: 3.601<br>P value: 0.060    | F value: 3.387<br>P value: 0.068    | F value: 0.0557<br>P value: 0.814   |
| PLT ( $10^9 l^{-1}$ )             | F value: 19.408<br>P value: < 0.001 | F value: 1.312<br>P value: 0.254    | F value: 7.634<br>P value: 0.006    |

For each parameter the degree of freedom was 1, the F value and the P value are reported.

**Table S2.** Two Way Analysis of Variance report for the blood parameters included in PCA after body weight normalisation

|                                  | Sex-gender                           | Smoke effect                      | Sex-gender x smoke                 |
|----------------------------------|--------------------------------------|-----------------------------------|------------------------------------|
| Glycaemia (mg dl <sup>-1</sup> ) | F value: 52.064<br>P value: < 0.001  | F value: 1.421<br>P value: 0.235  | F value: 4.630<br>P value: 0.033   |
| TChol (mg dl <sup>-1</sup> )     | F value: 115.273<br>P value: < 0.001 | F value: 0.535<br>P value: 0.465  | F value: 0.00005<br>P value: 0.994 |
| LDL (mg dl <sup>-1</sup> )       | F value: 69.336<br>P value: < 0.001  | F value: 3.329<br>P value: 0.070  | F value: 0.241<br>P value: 0.624   |
| HDL (mg dl <sup>-1</sup> )       | F value: 97.257<br>P value: < 0.001  | F value: 0.171<br>P value: 0.680  | F value: 2.691<br>P value: 0.103   |
| HDL/LDL                          | F value: 14.576<br>P value: < 0.001  | F value: 2.722<br>P value: 0.101  | F value: 6.194<br>P value: 0.014   |
| TG (mg dl <sup>-1</sup> )        | F value: 3.695<br>P value: 0.056     | F value: 5.237<br>P value: 0.023  | F value: 2.031<br>P value: 0.156   |
| Cr (mg ml <sup>-1</sup> )        | F value: 1.295<br>P value: 0.257     | F value: 0.0337<br>P value: 0.855 | F value: 2.023<br>P value: 0.157   |
| Urea (mg dl <sup>-1</sup> )      | F value: 2.912<br>P value: 0.090     | F value: 0.923<br>P value: 0.338  | F value: 0.497<br>P value: 0.482   |
| Uric Acid (mg dl <sup>-1</sup> ) | F value: 3.518<br>P value: 0.062     | F value: 0.059<br>P value: 0.807  | F value: 0.516<br>P value: 0.474   |
| AST (U l <sup>-1</sup> )         | F value: 0.002<br>P value: 0.960     | F value: 0.294<br>P value: 0.588  | F value: 0.095<br>P value: 0.759   |
| ALT (U l <sup>-1</sup> )         | F value: 5.005<br>P value: 0.027     | F value: 1.239<br>P value: 0.267  | F value: 4.437<br>P value: 0.037   |

## Smoking influence on male and female phenotypes

|                                                      |                                      |                                     |                                  |
|------------------------------------------------------|--------------------------------------|-------------------------------------|----------------------------------|
| $\gamma$ -GT (U l <sup>-1</sup> )                    | F value: 3.474<br>P value: 0.064     | F value: 3.978<br>P value: 0.048    | F value: 0.162<br>P value: 0.679 |
| Bilirubin (mg dl <sup>-1</sup> )                     | F value: 1.040<br>P value: 0.309     | F value: 1.066<br>P value: 0.303    | F value: 0.871<br>P value: 0.352 |
| Alkaline Phosphatase (U l <sup>-1</sup> )            | F value: 13.479<br>P value: < 0.001  | F value: 0.007<br>P value: 0.933    | F value: 0.286<br>P value: 0.593 |
| Na <sup>+</sup> (mEq l <sup>-1</sup> )               | F value: 118.773<br>P value: < 0.001 | F value: 0.141<br>P value: 0.708    | F value: 5.689<br>P value: 0.018 |
| K <sup>+</sup> (mEq l <sup>-1</sup> )                | F value: 89.214<br>P value: < 0.001  | F value: 0.540<br>P value: 0.464    | F value: 3.713<br>P value: 0.056 |
| Ca <sup>2+</sup> (mg dl <sup>-1</sup> )              | F value: 106.933<br>P value: < 0.001 | F value: 0.157<br>P value: 0.692    | F value: 2.438<br>P value: 0.120 |
| Sideremia ( $\mu$ g l <sup>-1</sup> )                | F value: 4.310<br>P value: 0.04      | F value: 0.008<br>P value: 0.929    | F value: 0.349<br>P value: 0.556 |
| TSH ( $\mu$ UI ml <sup>-1</sup> )                    | F value: 5.054<br>P value: 0.026     | F value: 0.060<br>P value: 0.806    | F value: 1.094<br>P value: 0.297 |
| RBC (10 <sup>12</sup> l <sup>-1</sup> )              | F value: 17.620<br>P value: < 0.001  | F value: 0.251<br>P value: 0.617    | F value: 3.718<br>P value: 0.056 |
| Hb (g dl <sup>-1</sup> )                             | F value: 35.310<br>P value: < 0.001  | F value: 0.294<br>P value: 0.589    | F value: 0.600<br>P value: 0.440 |
| Haematocrit (%)                                      | F value: 45.684<br>P value: < 0.001  | F value: 0.076<br>P value: 0.783    | F value: 1.807<br>P value: 0.181 |
| MCV (fl)                                             | F value: 114.848<br>P value: < 0.001 | F value: 1.638<br>P value: 0.202    | F value: 1.484<br>P value: 0.225 |
| WBC (10 <sup>9</sup> l <sup>-1</sup> )               | F value: 24.970<br>P value: < 0.001  | F value: 13.641<br>P value: < 0.001 | F value: 0.127<br>P value: 0.723 |
| Neutrophils (10 <sup>3</sup> $\mu$ l <sup>-1</sup> ) | F value: 14.350<br>P value: < 0.001  | F value: 7.867<br>P value: 0.006    | F value: 0.473<br>P value: 0.492 |
| Lymphocytes (10 <sup>3</sup> $\mu$ l <sup>-1</sup> ) | F value: 21.215<br>P value: < 0.001  | F value: 8.010<br>P value: 0.005    | F value: 0.065<br>P value: 0.799 |
| Monocytes (10 <sup>3</sup> $\mu$ l <sup>-1</sup> )   | F value: 1.894<br>P value: 0.171     | F value: 8.122<br>P value: 0.005    | F value: 0.004<br>P value: 0.951 |
| Eosinophils (10 <sup>3</sup> $\mu$ l <sup>-1</sup> ) | F value: 0.765<br>P value: 0.383     | F value: 7.989<br>P value: 0.005    | F value: 2.614<br>P value: 0.108 |
| Basophils (10 <sup>3</sup> $\mu$ l <sup>-1</sup> )   | F value: 0.376<br>P value: 0.541     | F value: 3.746<br>P value: 0.055    | F value: 0.107<br>P value: 0.744 |
| PLT (10 <sup>9</sup> l <sup>-1</sup> )               | F value: 98.399<br>P value: < 0.001  | F value: 1.558<br>P value: 0.214    | F value: 1.203<br>P value: 0.274 |

For each parameter the degree of freedom was 1, the F value and the P value are reported.

# Smoking influence on male and female phenotypes

A

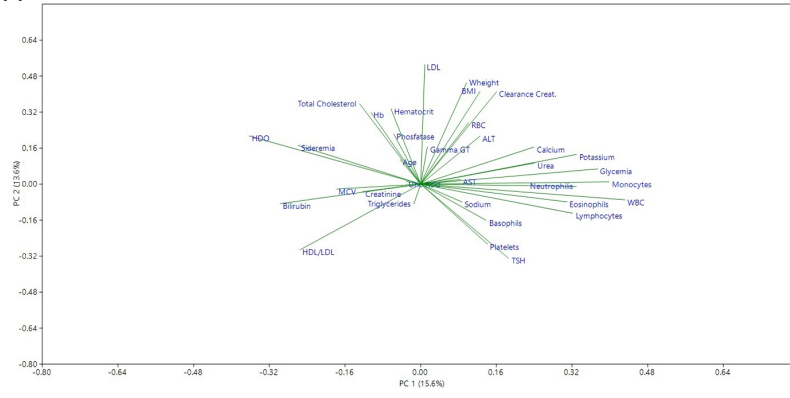

B

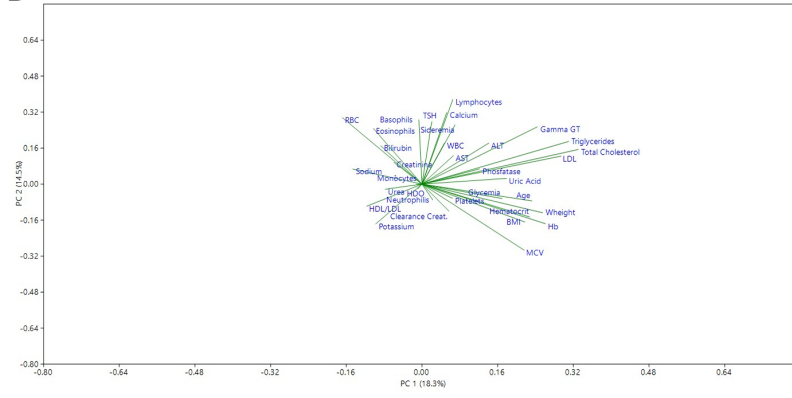

C

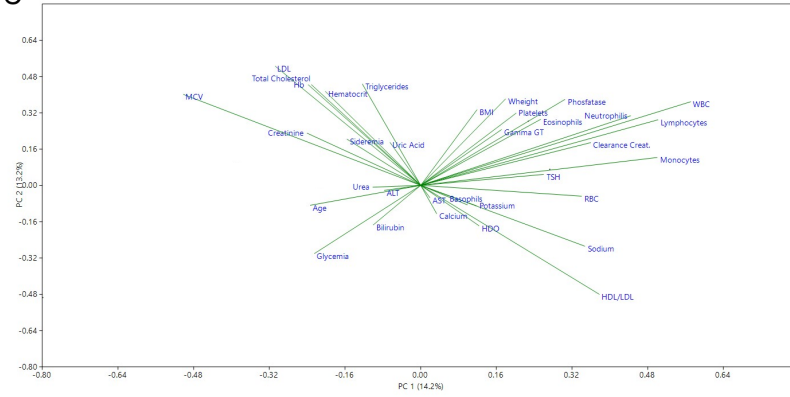

D

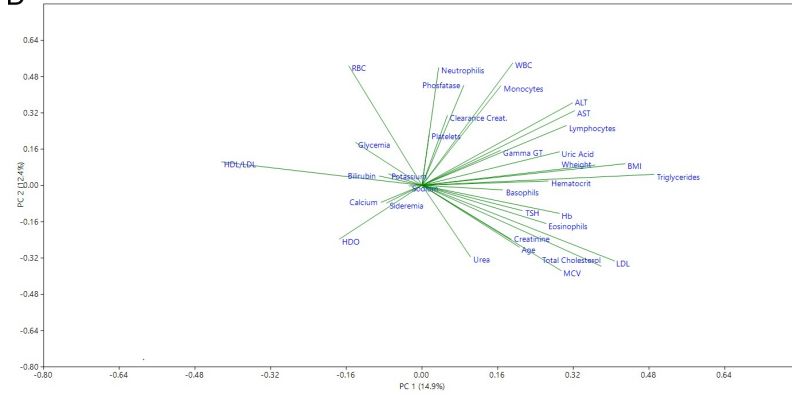

E

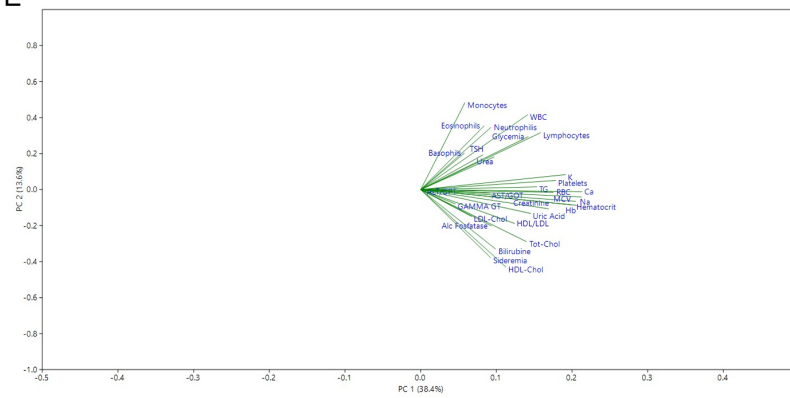

F

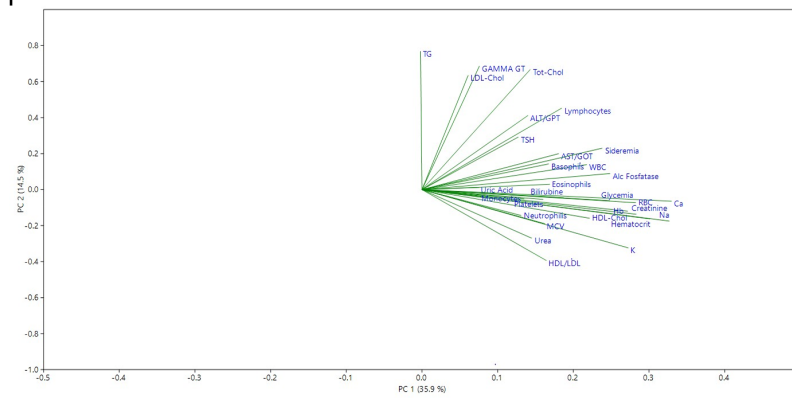

## Smoking influence on male and female phenotypes

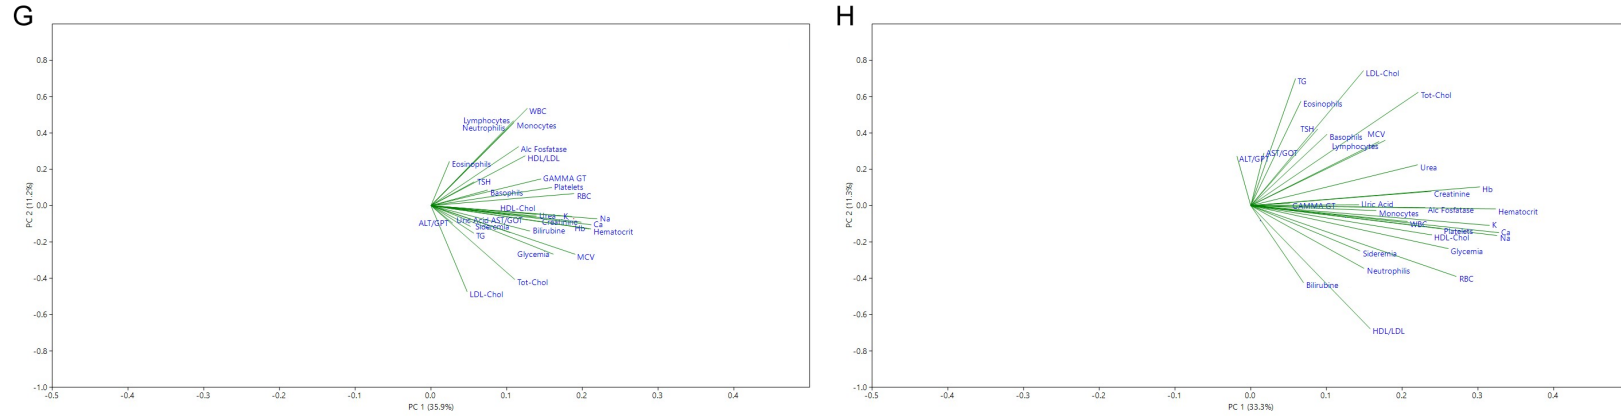

**Figure S1.** (A-D) Loading plots indicating the score of each observation on the first 2 principal components, as well as the contributing effect of each variable when the female (A) and male (B) smokers and non-smoker women (C) and men (D) were analyzed. (E-H) Loading plots indicating the score of each observation on the first 2 principal components, as well as the contributing effect of each variable when the weight normalized dataset is used. (E) Smoker women, (F) Smoker men, (G) Non-smoker women, (H) Non-smoker men.
